# Supplementary material for: Differences in the Plasma Proteome of Patients with Hypothyroidism before and after Thyroid Hormone Replacement: A Proteomic Analysis
Source: PubMed Central journal article supplement (PMC5796038; doi:10.3390/ijms19010088), 2018-01-01

# Supplementary

**Table S1.** Experimental design: 20 patient samples run on 10 2D-PAGE gels; samples were labeled randomly with Cy3 and Cy5, and a pooled sample stained with Cy2 was used as an internal standard.

| Gel | Cy3                 | Cy5                 | Cy2           |
|-----|---------------------|---------------------|---------------|
| 1   | 1<br>(Euthyroid)    | 11<br>(Hypothyroid) | Pooled sample |
| 2   | 12<br>(Hypothyroid) | 2<br>(Euthyroid)    | Pooled sample |
| 3   | 3<br>(Euthyroid)    | 13<br>(Hypothyroid) | Pooled sample |
| 4   | 14<br>(Hypothyroid) | 4<br>(Euthyroid)    | Pooled sample |
| 5   | 5<br>(Hypothyroid)  | 15<br>(Euthyroid)   | Pooled sample |
| 6   | 16<br>(Euthyroid)   | 6<br>(Hypothyroid)  | Pooled sample |
| 7   | 7<br>(Hypothyroid)  | 17<br>(Euthyroid)   | Pooled sample |
| 8   | 18<br>(Euthyroid)   | 8<br>(Hypothyroid)  | Pooled sample |
| 9   | 9<br>(Hypothyroid)  | 19<br>(Euthyroid)   | Pooled sample |
| 10  | 20<br>(Hypothyroid) | 10<br>(Euthyroid)   | Pooled sample |

**Table S2.** Canonical pathways and network Pathways obtained from IPA functional analysis.

## INGENUITY PATHWAY ANALYSIS

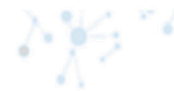

Analysis Name: Hypothyroid for IPA - 2016-10-27 12:08 PM  
 Analysis Creation Date: 2016-10-27  
 Build version: 400896M  
 Content version: 28820210 (Release Date: 2016-09-24)

### Analysis Settings

Reference set: Ingenuity Knowledge Base (Genes Only)  
 Relationship to include: Direct and Indirect  
 Does not Include Endogenous Chemicals  
 Optional Analyses: My Pathways My List

### Top Networks

| ID | Associated Network Functions                                                                   | Score |
|----|------------------------------------------------------------------------------------------------|-------|
| 1  | Neurological Disease, Immunological Disease, Metabolic Disease                                 | 28    |
| 2  | Cell-To-Cell Signaling and Interaction, Cellular Compromise, Cellular Function and Maintenance | 3     |

### Top Canonical Pathways

| Name                           | p-value  | Overlap     |
|--------------------------------|----------|-------------|
| Acute Phase Response Signaling | 2.35E-17 | 5.3 % 9/169 |
| Complement System              | 3.91E-09 | 10.8 % 4/37 |
| LXR/RXR Activation             | 4.36E-09 | 4.1 % 5/121 |
| FXR/RXR Activation             | 5.35E-09 | 4.0 % 5/126 |
| Coagulation System             | 1.74E-04 | 5.7 % 2/35  |

FigureS1: Power calculation for determination of the minimum number of required biological variants for 2-DIGE analysis. The power curve was used to calculate the sample size required to find significant difference with a fold-change of  $\geq 1.5$  between two paired groups at 80% power and  $p$ -value  $\leq 0.05$ .

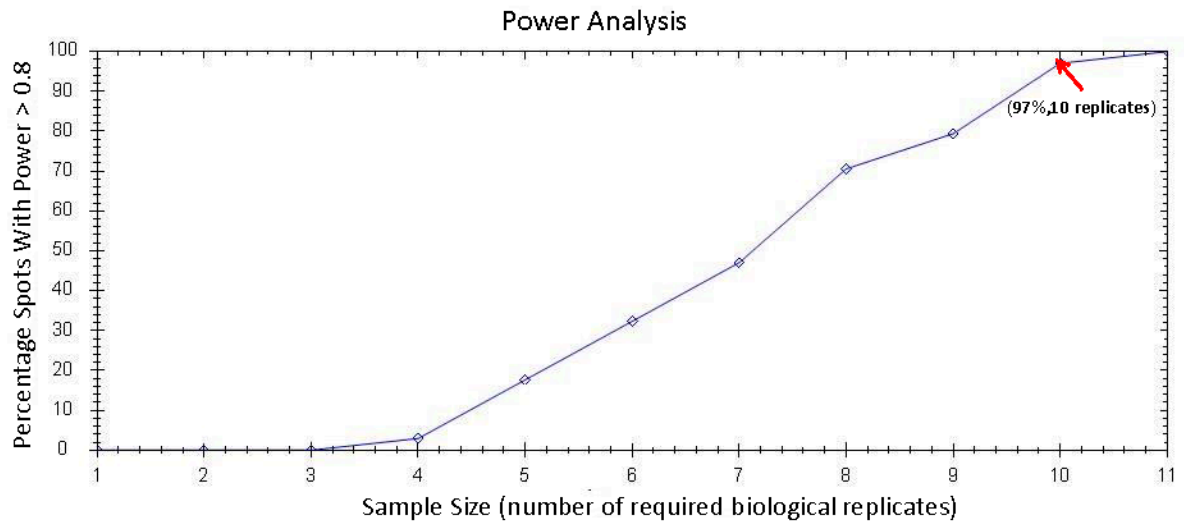

Figure S2: Representative focussing of the 13 protein spots between the euthyroid and hypothyroid samples on the 2D-DIGE gel images and their expression between the two groups.

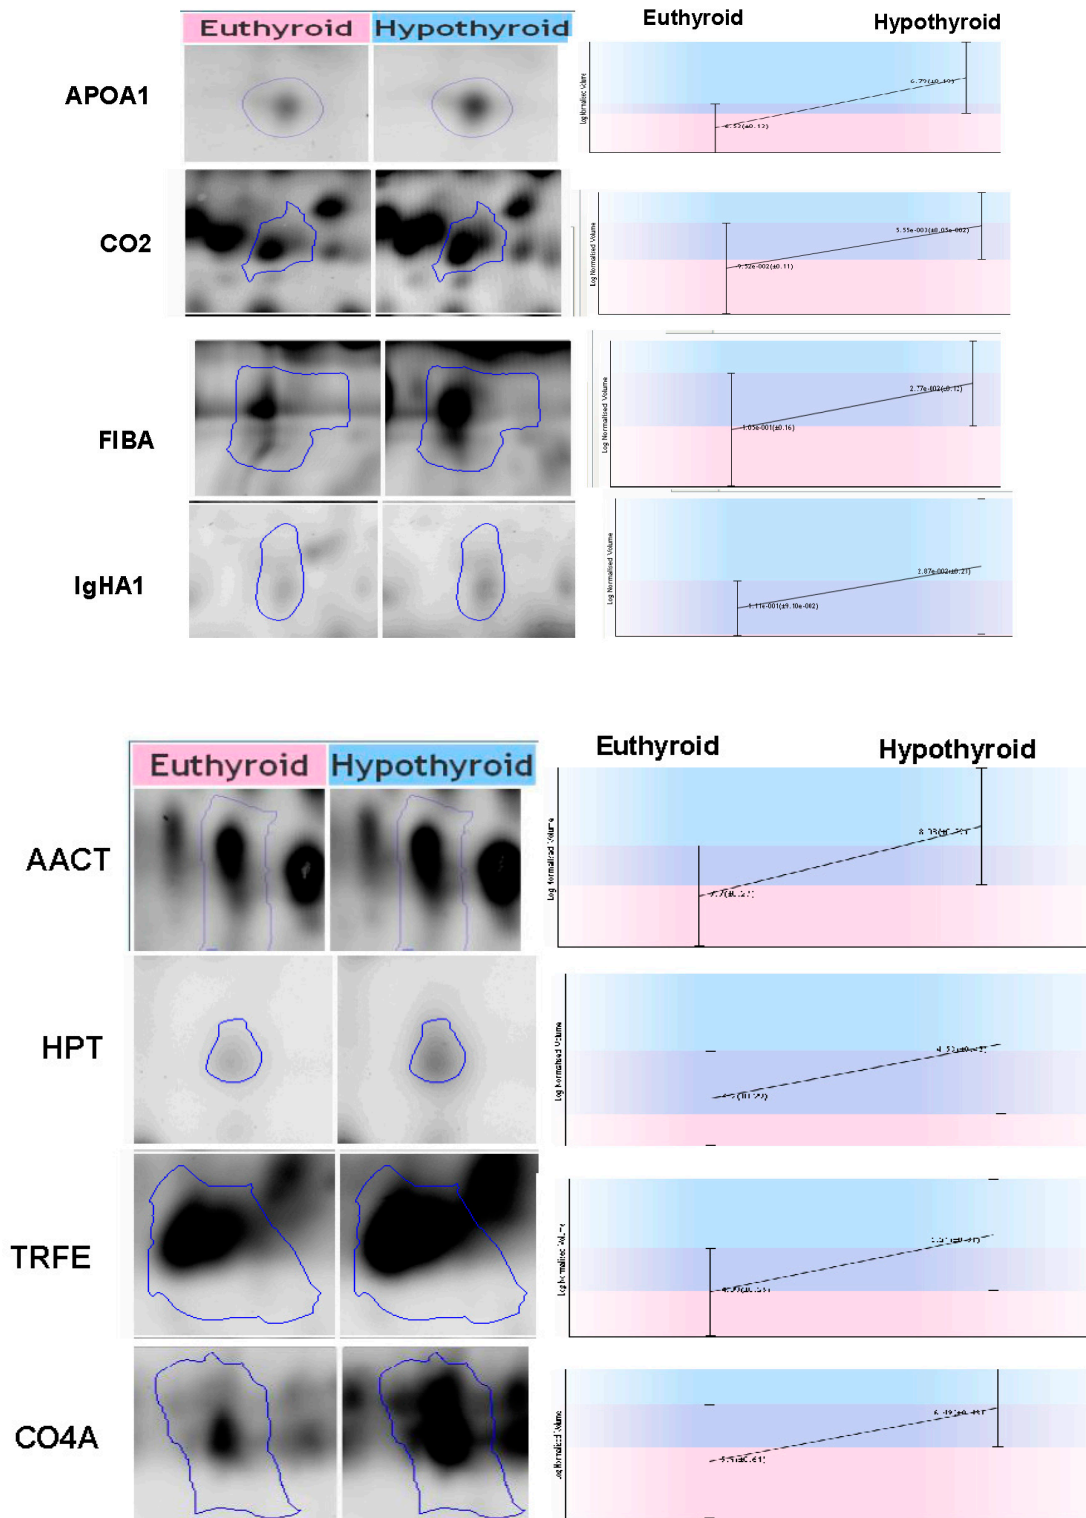

Supplement: ijms-19-00088-s001.pdf [file ijms-19-00088-s001.pdf]
